# Supplementary material for: Propylene homopolymerization and copolymerization with ethylene by acenaphthene-based α-diimine nickel complexes to access EPR-like elastomers
Source: Royal Society of Chemistry journal article supplement (doi:10.1039/d1py00923k), 2021-01-01
Supplement: d1py00923k1.pdf [file d1py00923k1.pdf]

Electronic Supplementary Material (ESI) for Polymer Chemistry.

This journal is © The Royal Society of Chemistry 2021

## Electronic Supplementary Information

# **Propylene Homopolymerization and Copolymerization with Ethylene by Acenaphthene-Based $\alpha$ -Diimine Nickel Complexes to Access EPR-Like Elastomers**

Beibei Wang,<sup>a,b,c</sup> Heng Liu,<sup>c</sup> Chunyu Zhang,<sup>c</sup> Tao Tang,<sup>a,b\*</sup> and Xuequan Zhang<sup>c\*</sup>

<sup>a</sup> State Key Laboratory of Polymer Physics and Chemistry, Changchun Institute of Applied Chemistry, Chinese Academy of Sciences, Changchun 130022, China

<sup>b</sup> University of Science and Technology of China, Hefei, 230026, Anhui, PR China;

<sup>c</sup> Key Laboratory of Rubber-Plastics, Ministry of Education/ Shandong Provincial Key Laboratory of Rubber-plastics, Qingdao University of Science & Technology, Qingdao, 266042, China;

# S1. Nickel-catalyzed polypropylenes

## S1.1

**Table S1** Calculated and observed carbon-13 chemical shifts and assignments for nickel catalyzed polypropylene.

| Peak no. | Chemical shift |        | Sequence                   | carbon                |                     |                                 |                                    |  |
|----------|----------------|--------|----------------------------|-----------------------|---------------------|---------------------------------|------------------------------------|--|
|          | Exptl.         | Calcd. |                            |                       |                     |                                 |                                    |  |
| 1        | 11.26          | 11.36  | EEtE                       | 1B <sub>2</sub>       |                     |                                 |                                    |  |
| 2        | 13.99          | 13.86  | ELE                        | 1B <sub>n</sub>       |                     |                                 |                                    |  |
| 3        | 15.17          | 16.64  | PP*P                       | 1B <sub>1</sub>       | P <sub>αγ</sub>     |                                 |                                    |  |
| 4        | 16.49          | 17.13  | PPP*                       | 1B <sub>1</sub>       | P <sub>αβ</sub>     |                                 |                                    |  |
| 5        | 19.51-20.43    | 20.61  | PPP <sub>rr</sub>          | 1B <sub>1</sub>       | P <sub>ββ</sub>     |                                 |                                    |  |
|          |                | 20.10  | PPPPP <sub>rrrr</sub>      | 1B <sub>1</sub>       | P <sub>ββ</sub>     |                                 |                                    |  |
|          |                | 19.96  | PPPPP <sub>rrrm</sub>      | 1B <sub>1</sub>       | P <sub>ββ</sub>     |                                 |                                    |  |
|          |                | 19.88  | PPPPP <sub>mrrm</sub>      | 1B <sub>1</sub>       | P <sub>ββ</sub>     |                                 |                                    |  |
|          |                |        | 19.63                      | EPE                   | 1B <sub>1</sub>     | P <sub>δδ</sub>                 |                                    |  |
|          |                |        | 19.63                      | EP*PE+EP*PE           | 1,4-1B <sub>1</sub> | P <sub>γδ</sub> P <sub>γγ</sub> |                                    |  |
| 6        | 20.43-21.16    | 20.98  | PPPPP <sub>mrrr</sub>      | 1B <sub>1</sub>       | P <sub>ββ</sub>     |                                 |                                    |  |
|          |                | 20.78  | PPPPP <sub>mrrm+rmrr</sub> | 1B <sub>1</sub>       | P <sub>ββ</sub>     |                                 |                                    |  |
|          |                | 20.64  | PPPPP <sub>mrrr</sub>      | 1B <sub>1</sub>       | P <sub>ββ</sub>     |                                 |                                    |  |
|          |                |        | 20.12                      | EPP+PPE               | 1B <sub>1</sub>     | P <sub>βδ</sub>                 |                                    |  |
|          |                |        |                            | P*PP                  | 1,4-1B <sub>1</sub> | P <sub>βγ</sub>                 |                                    |  |
| 7        | 21.20-21.82    | 20.61  | PPP <sub>mm</sub>          | 1B <sub>1</sub>       | P <sub>ββ</sub>     |                                 |                                    |  |
|          |                | 21.72  | PPPPP <sub>mmmm</sub>      | 1B <sub>1</sub>       | P <sub>ββ</sub>     |                                 |                                    |  |
|          |                | 21.53  | PPPPP <sub>mmmr</sub>      | 1B <sub>1</sub>       | P <sub>ββ</sub>     |                                 |                                    |  |
|          |                | 21.35  | PPPPP <sub>rmmr</sub>      | 1B <sub>1</sub>       | P <sub>ββ</sub>     |                                 |                                    |  |
| 8        | 22.98-23.82    | 23.49  | ELE                        | 2B <sub>n</sub>       |                     |                                 |                                    |  |
|          |                | 23.26  | EiBuE                      | 1B <sub>iBu</sub>     |                     |                                 |                                    |  |
|          |                | 23.15  | E2MHE                      | 1B <sub>2ME</sub>     |                     |                                 |                                    |  |
|          |                | 24.73  | PEP                        | β'B <sub>1</sub>      | S <sub>ββ</sub>     |                                 |                                    |  |
| 9        | 24.73          | 24.58  | PEP                        | β'B <sub>1</sub>      | S <sub>ββ</sub>     |                                 |                                    |  |
| 10       | 25.96          | 25.92  | EiBuE                      | 2B <sub>iBu</sub>     |                     |                                 |                                    |  |
| 11       | 27.00-27.50    | 27.34  | 27.27                      | PEE+EEP               | βB <sub>1</sub>     | S <sub>βδ</sub>                 |                                    |  |
|          |                |        |                            | PPPE+EEP <sub>r</sub> |                     |                                 |                                    |  |
|          |                |        |                            | PPPE+EEP <sub>m</sub> |                     |                                 |                                    |  |
|          |                |        |                            | EPEE+EEPE             |                     |                                 |                                    |  |
|          |                |        |                            | EiBuE                 | βB <sub>iBu</sub>   |                                 |                                    |  |
|          |                |        |                            |                       | 27.52               | ELE                             | βB <sub>n+(n-1)B<sub>n</sub></sub> |  |
|          |                |        |                            |                       | 27.77               | EEtE                            | βB <sub>2</sub>                    |  |
|          |                |        |                            |                       | 27.16               | EEtE                            | 2B <sub>2</sub>                    |  |
|          |                |        |                            |                       | 27.27               | E2MHE                           | 4B <sub>2ME</sub>                  |  |
|          |                |        |                            |                       |                     |                                 |                                    |  |
| 12       | 27.50-27.98    | 27.72  | 27.52                      | 1,6-β'B <sub>1</sub>  | S <sub>βγ</sub>     |                                 |                                    |  |
|          |                |        |                            |                       |                     |                                 |                                    |  |
| 13       | 28.18          | 27.77  | E2MHE                      | 5B <sub>2ME</sub>     |                     |                                 |                                    |  |
| 14       | 28.63          | 28.38  | PPP                        | brB <sub>1</sub>      | T <sub>βγ</sub>     |                                 |                                    |  |
| 15       | 29.47          | 29.71  | ELE                        | 4B <sub>n</sub>       |                     |                                 |                                    |  |
| 16       | 29.92          | 29.96  | EEE                        |                       | S <sub>δδ</sub>     |                                 |                                    |  |
| 17       | 30.34          | 30.21  | EEEP                       | γB <sub>1</sub>       | S <sub>γδ</sub>     |                                 |                                    |  |
| 18       | 30.63-31.47    | 30.91  | 30.45                      | EPP+PPE               | brB <sub>1</sub>    | T <sub>βδ</sub>                 |                                    |  |
|          |                |        |                            | P*PP                  |                     | T <sub>βγ</sub>                 |                                    |  |
|          |                |        |                            |                       | 30.45               | ELE                             | γB <sub>n+(n-2)B<sub>n</sub></sub> |  |
|          |                |        |                            |                       | 30.21               | E2MHE                           | γB <sub>2MH</sub>                  |  |
|          |                |        |                            |                       | 30.21               | EiBuE                           | γB <sub>iBu</sub>                  |  |

|    |             |       |                |                                      |                                                                               |
|----|-------------|-------|----------------|--------------------------------------|-------------------------------------------------------------------------------|
|    |             | 30.21 | EEtE           | $\gamma B_{Et}$                      |                                                                               |
| 19 | 33.22       | 32.52 | EPE            | brB <sub>1</sub>                     | T <sub><math>\delta\delta</math></sub>                                        |
| 20 | 33.66       | 32.52 | EP*PE+EP*PE    | 1,4-brB <sub>1</sub>                 | T <sub><math>\gamma\delta</math></sub> T <sub><math>\gamma\gamma</math></sub> |
| 21 | 34.66       | 34.47 | P*P*PP+P*P*PP  | 1,4- $\alpha'$ B <sub>1</sub>        | S <sub><math>\gamma\alpha\beta\delta</math></sub>                             |
| 22 | 35.10       | 34.47 | ELE            | $\alpha B_n+nB_n$                    |                                                                               |
|    |             | 34.47 | E2MHE          | $\alpha B_{2MH}+6B_{2MH}$            |                                                                               |
|    |             | 34.47 | EiBuE          | $\alpha B_{iBu}$                     |                                                                               |
|    |             | 34.47 | EEtE           | $\alpha B_{Et}$                      |                                                                               |
|    |             | 34.22 | EP*PE+EP*PE    |                                      | S <sub><math>\delta\alpha\beta\delta</math></sub>                             |
| 23 | 35.61       | 34.98 | EiBuE          | brB <sub>iBu</sub>                   |                                                                               |
|    |             | 34.99 | PPP*           | 1,2-brB <sub>1</sub>                 | T <sub><math>\alpha\beta</math></sub>                                         |
| 24 | 35.92       | 34.72 | PP*PP          | 1,4- $\alpha'$ B <sub>1</sub>        | S <sub><math>\gamma\alpha\beta\delta</math></sub>                             |
| 25 | 37.10-37.99 |       |                |                                      |                                                                               |
|    |             | 36.91 | EPE+EPEE       | $\alpha B_1$                         | S <sub><math>\alpha\delta</math></sub>                                        |
|    |             | 37.16 | PPEE+EEPP+EPEP | $\alpha B_1$                         | S <sub><math>\alpha\delta</math></sub>                                        |
|    |             | 37.41 | PPEPmm+PEPPmm  | $\alpha\gamma B_1$                   | S <sub><math>\alpha\gamma</math></sub>                                        |
|    |             | 37.06 | PP*P           | 1,2-brB <sub>1</sub>                 | T <sub><math>\alpha\gamma</math></sub>                                        |
|    |             | 37.05 | ELE+E2MHE      | brB <sub>n</sub> +brB <sub>2MH</sub> |                                                                               |
| 26 | 38.36       | 37.16 | PEPEr          | $\alpha' B_1$                        | S <sub><math>\alpha\gamma</math></sub>                                        |
|    |             |       | EEPPr          | $\alpha' B_1$                        | S <sub><math>\alpha\gamma</math></sub>                                        |
| 27 | 38.51       | 37.41 | PEPP+PPEPmr+rm | $\alpha' B_1$                        | S <sub><math>\alpha\gamma</math></sub>                                        |
|    |             |       | PEPP+PPEPr     |                                      |                                                                               |
|    |             |       | PEPPmr+rm      |                                      |                                                                               |
|    |             |       | PEPPrr         |                                      |                                                                               |
| 28 | 39.43       | 39.35 | E2MHE          | 3B <sub>2ME</sub> , brB <sub>2</sub> |                                                                               |
| 29 | 44.01       | 43.86 | EiBuE          | 3B <sub>iBu</sub>                    |                                                                               |
| 30 | 45.32-48.13 |       |                | $\alpha\alpha B_1$                   |                                                                               |
|    |             | 41.17 | P*PPP*         |                                      | S <sub><math>\delta\alpha\alpha\beta</math></sub>                             |
|    |             | 41.42 | PPP*           |                                      | S <sub><math>\gamma\alpha\alpha\beta</math></sub>                             |
|    |             | 43.86 | EPPE           |                                      | S <sub><math>\alpha\alpha</math></sub>                                        |
|    |             | 44.11 | PPPE           |                                      |                                                                               |
|    |             | 44.36 | PPPrr          |                                      |                                                                               |

## S1.2

### Equations for quantitative analysis:

$$[PPP] = k (I_{14})$$

$$[PPE+EPP] = k (I_{18} - 3 I_2 - 2 I_{28} - 2 I_{29} - 2 I_1)$$

$$[EPE] = k (I_{19})$$

$$[EEE] = k (I_{16}/2)$$

$$[PEE+EEP] = k (I_{11} - I_{28} - 3I_1 - 3I_2 - 2I_{29})$$

$$[PEP] = k (I_9)$$

$$[PP*P] = k (I_3)$$

$$[PPP*] = k (I_4)$$

$$[PP*PP] = k (I_{24})$$

$$[P*P*PP] = k ((I_{21}) / 2)$$

$$[1,4-B_1] = k ((I_{20}) / 2)$$

$$[1,6-\beta B_1] = k ((I_{12})/2)$$

$$[ELE] = k (I_2)$$

$$[EEtE] = k (I_1)$$

$$[EiBuE] = k ((I_{10} + I_{29})/2)$$

$$[E2MHE] = k (I_{28})/2$$

where  $k$  is the normalization constant.

## S2. Nickel catalyzed copolymerization of ethylene and propylene

### S2.1 Kinetic studies of *rac*-Ni<sub>2</sub> catalyzed copolymerization of ethylene and propylene.

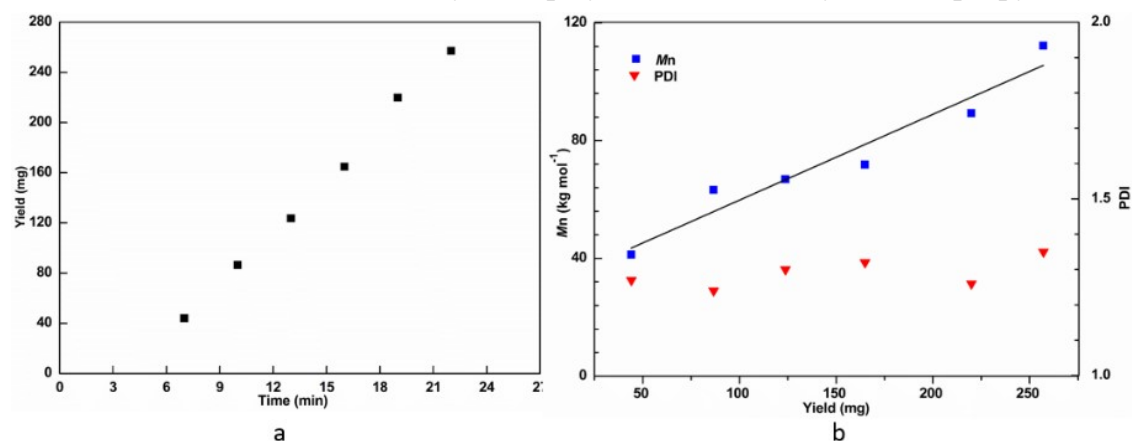

Figure S1. Plots of  $M_n$  (■) and  $M_w/M_n$  (▲) versus polymerization time for propylene and ethylene copolymerization

### S2.1

Table S2. Carbon-13 chemical shifts in previous and present researches and their assignments for nickel catalyzed ethylene/propylene copolymer.

| Peak no. | Chemical shift (ppm) |        | Sequence    | Carbon type                          | Carbon type     |
|----------|----------------------|--------|-------------|--------------------------------------|-----------------|
|          | Exptl.               | Calcd. |             |                                      |                 |
| 1        | 11.27                | 11.36  | EEtE        | 1B <sub>2</sub>                      |                 |
| 2        | 13.99                | 13.86  | ELE         | 1B <sub>n</sub>                      |                 |
| 3        | 14.46                | 14.35  | EPrE        | 1B <sub>3</sub>                      |                 |
| 4        | 19.65                | 19.63  | EPE         | 1B <sub>1</sub>                      |                 |
| 5        | 20.07                | 19.63  | EP*PE+EP*PE | 1B <sub>1</sub>                      | P <sub>δδ</sub> |
|          | 20.49                | 20.12  | EPP+PPE     | 1B <sub>1</sub>                      | P <sub>βδ</sub> |
|          |                      | 20.21  | EPrE        | 2B <sub>3</sub>                      |                 |
| 6        | 22.51                | 22.65  | ELE         | 2B <sub>n</sub>                      |                 |
| 7        | 23.12                | 23.13  | E2MHE       | 1B <sub>2MH</sub>                    |                 |
| 8        | 23.24                | 22.62  | EiBuE       | 1B <sub>iBu</sub>                    |                 |
| 9        | 24.78                | 24.58  | PEP         | β'B <sub>1</sub>                     | S <sub>ββ</sub> |
| 10       | 26.00                | 25.92  | EiBuE       | 2B <sub>iBu</sub>                    |                 |
| 11       | 27.06                | 27.52  | ELE         | βB <sub>n</sub> +(n-1)B <sub>n</sub> |                 |

|    |             |       |                             |                              |                                      |
|----|-------------|-------|-----------------------------|------------------------------|--------------------------------------|
| 12 | 27.18-28.15 |       |                             |                              |                                      |
|    | 27.40       | 27.27 | <u>PEE</u> + <u>EEP</u>     | $\beta B_1$                  | $S_{\beta\delta}$                    |
|    |             |       | <u>EPEE</u> + <u>EEPE</u>   |                              |                                      |
|    |             |       | <u>PPEE</u> + <u>EEPP</u>   |                              |                                      |
|    |             |       | <u>EiBuE</u>                | $\beta B_{iBu}$              |                                      |
|    |             | 27.77 | <u>EEtE</u>                 | $\beta B_2$                  |                                      |
|    |             | 27.16 | <u>EEtE</u>                 | $2B_2$                       |                                      |
|    |             | 27.27 | <u>E2MHE</u>                | $4B_{2MH}$                   |                                      |
| 13 | 27.80       | 27.52 |                             | $1,6-\beta'B_1$              | $S_{\beta\gamma}$                    |
| 14 | 28.20       | 27.77 | <u>E2MHE</u>                | $5B_{2MH}$                   |                                      |
| 15 | 29.50       | 29.71 | <u>ELE</u>                  | $4B_n$                       |                                      |
| 16 | 29.95       | 29.96 | <u>EEE</u>                  |                              | $S_{\delta\delta}$                   |
| 17 | 30.22-30.67 |       |                             |                              |                                      |
|    |             | 30.45 | <u>EPP</u> + <u>PPE</u>     | $brB_1$                      | $T_{\beta\delta}$                    |
|    |             | 30.21 | <u>ELE</u>                  | $\gamma B_n+(n-2)B_n$        |                                      |
|    |             | 30.21 | <u>E2MHE</u>                | $\gamma B_{2MH}$             |                                      |
|    |             | 30.21 | <u>EiBuE</u>                | $\gamma B_{iBu}$             |                                      |
|    |             | 30.21 | <u>EEtE</u>                 | $\gamma B_{Et}$              |                                      |
| 18 | 31.71-32.27 |       |                             |                              |                                      |
|    | 33.25       | 32.40 | <u>ELE</u>                  | $3B_n$                       |                                      |
| 19 | 33.31       | 32.52 | <u>EPE</u>                  | $brB_1$                      | $T_{\delta\delta}$                   |
| 20 | 33.69       | 32.52 | <u>EP*PE</u> + <u>EP*PE</u> | $1,4-brB_1$                  | $T_{\gamma\delta}, T_{\gamma\gamma}$ |
| 21 | 34.06-35.59 |       |                             |                              |                                      |
|    |             | 34.22 | <u>EP*PE</u> + <u>EP*PE</u> |                              | $S_{\alpha\beta}$                    |
|    |             | 34.47 | <u>ELE</u>                  | $\alpha B_n+nB_n$            |                                      |
|    |             | 34.47 | <u>E2MHE</u>                | $\alpha B_{2MH}+6B_{2MH}$    |                                      |
|    |             | 34.47 | <u>EiBuE</u>                | $\alpha B_{iBu}$             |                                      |
|    |             | 34.47 | <u>EEtE</u>                 | $\alpha B_{Et}$              |                                      |
|    |             | 34.98 | <u>EiBuE</u>                | $brB_{iBu}$                  |                                      |
| 22 | 37.00       | 36.91 | <u>EP<sub>r</sub>E</u>      | $3B_3$                       |                                      |
| 23 | 37.41-38.14 |       |                             |                              |                                      |
|    | 37.55       | 36.91 | <u>EPE</u>                  | $\alpha B_1, 1,4-\alpha B_1$ | $S_{\alpha\delta}$                   |
|    |             | 37.05 | <u>ELE</u> + <u>E2MHE</u>   | $brB_n+brB_{2MH}$            |                                      |
|    |             | 37.05 | <u>EP<sub>r</sub>E</u>      | $brB_3$                      |                                      |
| 24 | 38.25-38.82 | 37.16 | <u>PEPE</u>                 | $\alpha'B_1$                 | $S_{\alpha\gamma}$                   |
|    |             |       | <u>EEPP</u>                 | $\alpha'B_1$                 | $S_{\alpha\gamma}$                   |
| 25 | 39.50       | 39.35 | <u>E2MHE</u>                | $3B_{2ME}$                   |                                      |
|    |             | 39.12 | <u>EEtE</u>                 | $brB_2$                      |                                      |
| 26 | 44.00       | 43.86 | <u>EiBuE</u>                | $3B_{iBu}$                   |                                      |
| 27 | 45.30-46.44 | 43.86 | <u>EPPE</u>                 |                              | $S_{\alpha\alpha}$                   |

### S2.3 Equations for quantitative analysis:

[PPP] triad, not observed

$$[\text{PPE+EPP}] = k (I_{27})$$

$$[\text{EPE}] = k (I_{19})$$

$$[\text{EEE}] = k (I_{16}/2)$$

$$[\text{PEE+EEP}] = k(I_{12} - 3I_1 - 2I_8 - 2I_7)$$

$$[\text{PEP}] = k (I_9)$$

$$[\text{EP*PE}] = k (I_{20}) /2)$$

$$[1,6-\beta'B_1] = k ((I_{13})/2)$$

$$[\text{ELE}] = k (I_2)$$

$$[\text{EEtE}] = k (I_1)$$

$$[\text{EPrE}] = k (I_3)$$

$$[\text{EiBuE}] = k (I_8)$$

$$[\text{E2MHE}] = k (I_7)$$

where  $k$  is the normalization constant.

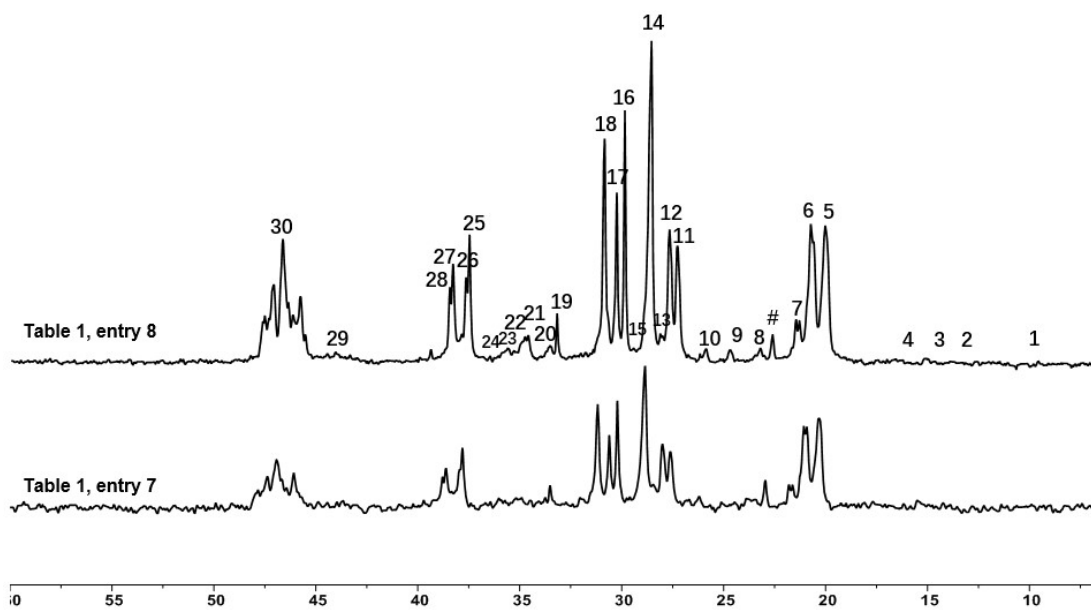

**Figure S2.**  $^{13}\text{C}$  NMR spectra of nickel-catalyzed polypropylenes. (carbon assignments can be found in Table S1)

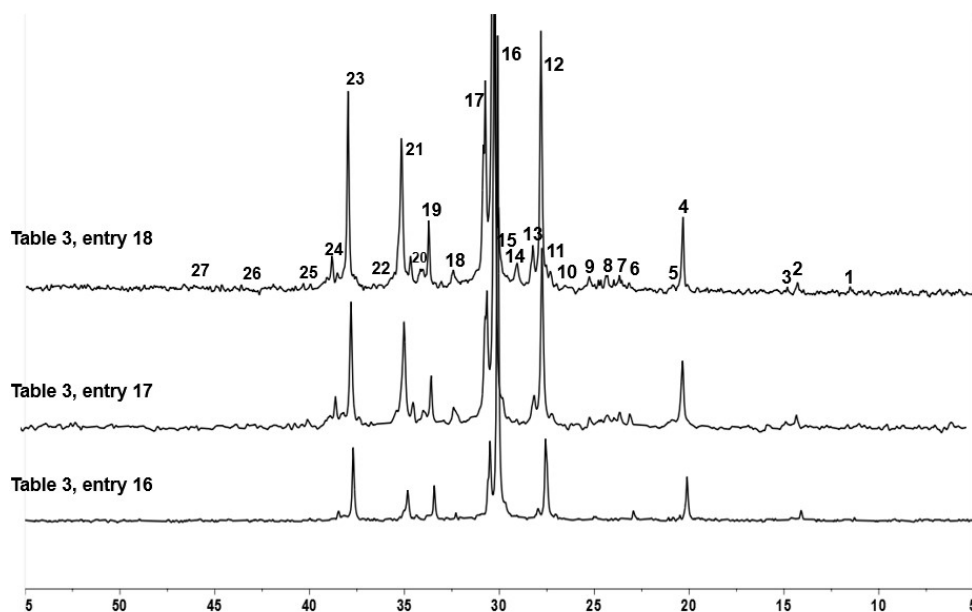

**Figure S3.**  $^{13}\text{C}$  NMR spectra of *rac*-Ni5-catalysed ethylene/propylene copolymers. (carbon assignments can be found in Table S1)

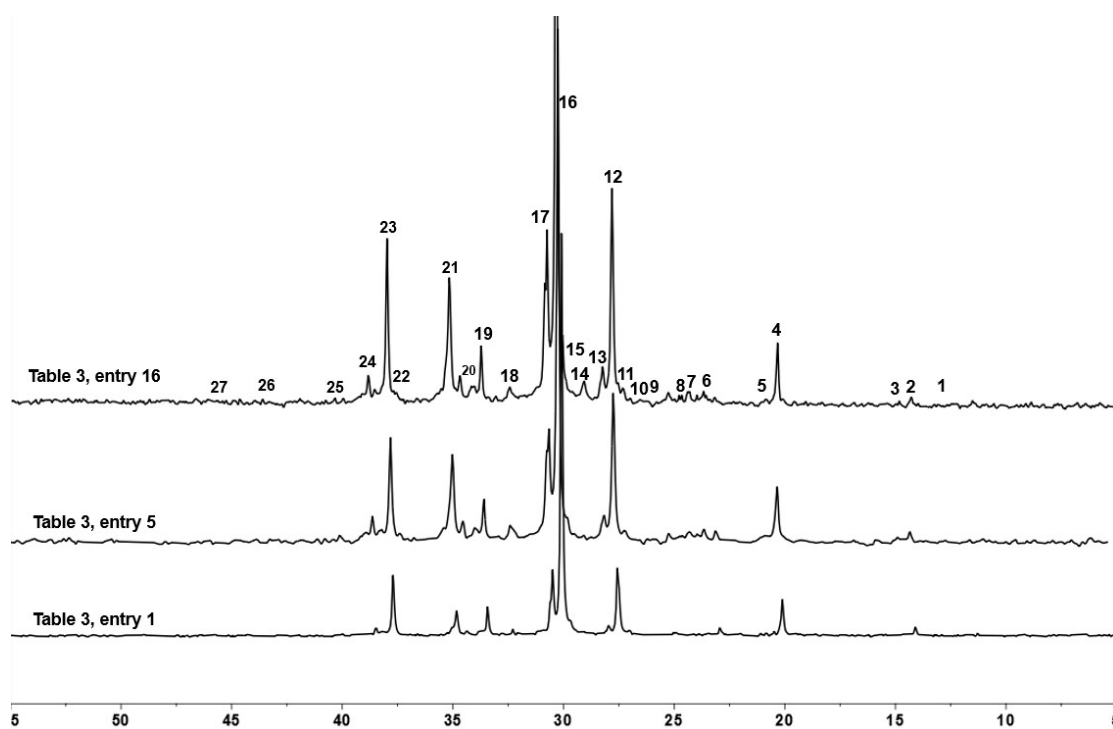

**Figure S4.**  $^{13}\text{C}$  NMR spectra of entry 1, entry 5 and entry 16 in Table 3. (carbon assignments can be found in Table S1)

**Table S3.** Quantitative analysis of nickel-catalyzed ethylene/propylene

copolymer.

| Sequence                     | Entry 1 | Entry 5 | Entry 16 | Entry 17 | Entry 18 |
|------------------------------|---------|---------|----------|----------|----------|
| 0                            | 0       | 0       | 0        | 0        | 0        |
| PPE+EPP                      | 0       | 0       | 0        | 0        | 0        |
| EPE                          | 6.3     | 9.9     | 7.4      | 4.0      | 5.0      |
| EEE                          | 50.2    | 54.6    | 60.2     | 59.4     | 53.9     |
| PEE+EEP                      | 27.3    | 21.8    | 23.3     | 29.8     | 32.2     |
| PEP                          | 2.8     | 3.3     | 1.0      | 0.8      | 0.7      |
| EP*PE                        | 2.0     | 1.4     | 2.0      | 1.4      | 2.2      |
| 1,6- $\beta$ 'B <sub>1</sub> | 13.7    | 6.1     | 3.9      | 3.1      | 5.4      |
| long branch                  | 2.7     | 2.6     | 1.6      | 0.8      | 0.3      |
| ethyl                        | 0.3     | 0.1     | 0        | 0.2      | 0        |
| propyl                       | 0.1     | 0       | 0        | 0.1      | 0        |
| <i>iso</i> -butyl            | 0.1     | 0       | 0        | 0.2      | 0.1      |
| 2-methyl hexyl               | 0.1     | 0.2     | 0        | 0.2      | 0.1      |

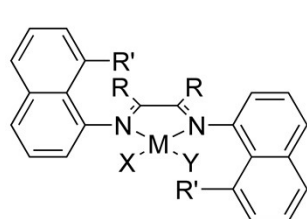

R' = Me, n-Bu, Bn  
R = Me, acenaphthene  
M = Ni, Pd

I

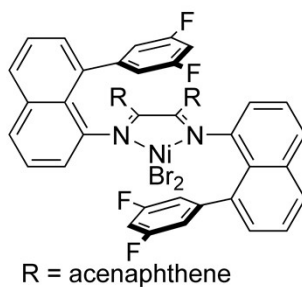

R = acenaphthene

II

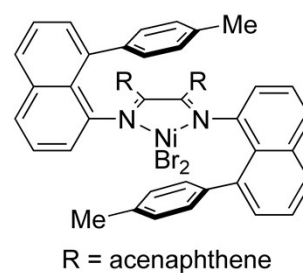

R = acenaphthene

III

**Scheme S1.** Reported 8-(R)-Naphthyl  $\alpha$ -diimine nickel(II) catalysts.



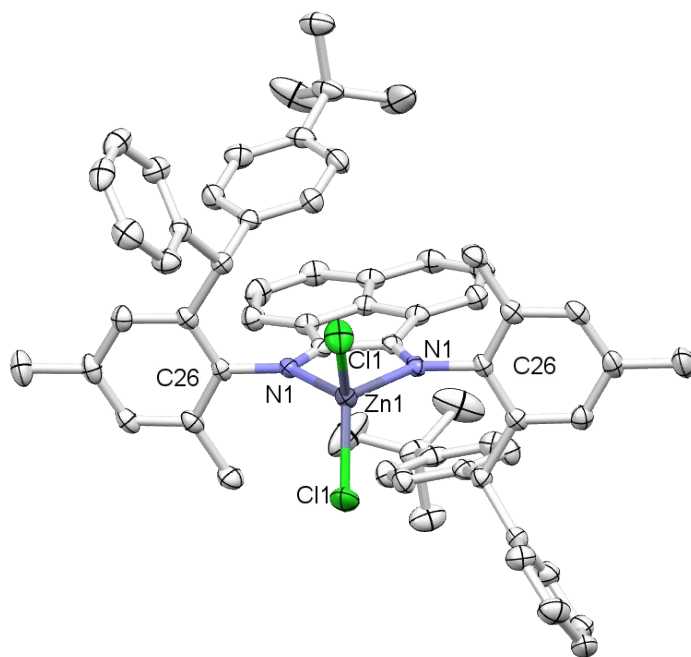

Figure S5. Single crystal structure of *rac*-L4·ZnCl<sub>2</sub>.

## 1. Experimental sections

### Procedure for the Synthesis of Ligand *rac*-L1-L5

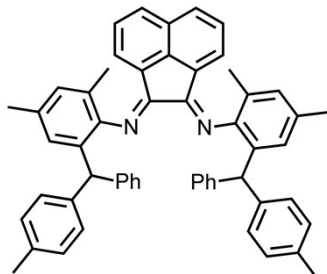

Step 1: In a 100 ml round-bottom flask, ZnCl<sub>2</sub> (204 mg, 1.5 mmol) and acenaphthenequinone (274 mg, 1.5 mmol) was added. Then glacial acetic acid (5 mL) and 2,4-dimethyl-6-(phenyl(*p*-tolyl)methyl)benzenamine (904 mg, 3.0 mmol) was also added and the reaction mixture was refluxed under stirring overnight. After the reaction finished, the mixture was cooled to room temperature and a red solid precipitated. The solid was filtered and washed with diethyl ether (3 x 10 mL). Then drying under vacuum, a bright red solid was obtained. Step 2: The products of the previous step was dissolved in dichloromethane (40 mL) and a solution of potassium oxalate (0.553 g, 3 mmol) in water (3 mL) was added. The reaction mixture was stirred vigorously overnight. Until the reaction finished, the organic phase was separated and washed with water (3 x 10 mL), then the organic phase was dried with MgSO<sub>4</sub>. Then the solvent was removed under vacuum to afford the product as an orange powder (Yield: 643 mg, 54.6%). <sup>1</sup>H NMR (400 MHz, Chloroform-*d*) δ 7.57 (d, 2H), 7.23 – 6.93 (m, 14H), 6.88 – 6.79 (m, 2H), 6.70 (d, 3H), 6.31 (t, 4H), 6.08 (m, 3H), 5.65 (d, 2H), 2.32 (d, 6H), 2.29 (d, 6H), 2.25 (d, 6H). <sup>13</sup>C NMR (101 MHz, Chloroform-*d*) δ 163.15, 162.92, 146.51, 143.67, 141.98, 140.64, 140.63, 139.78, 138.59, 135.39, 134.18, 133.17, 133.13, 132.67,

132.64, 129.84, 129.80, 129.64, 129.60, 129.52, 129.19, 129.15, 129.07, 129.04, 128.99, 128.88, 128.72, 128.03, 128.00, 127.91, 127.88, 127.57, 127.51, 127.18, 127.14, 127.01, 126.93, 125.89, 125.04, 125.02, 124.97, 124.75, 124.71, 122.55, 122.52, 122.39, 122.36, 52.20, 52.16, 21.28, 21.01, 20.09, 17.91, 17.87, 17.83.

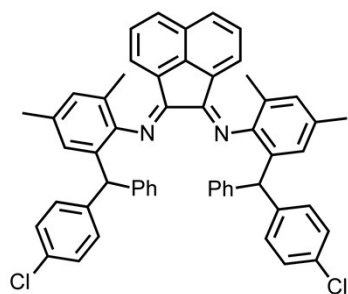

The procedure was similar to the synthesis of *rac-L1* except that 2-((4-chlorophenyl)(phenyl)methyl)-4,6-dimethylbenzenamine (966 mg, 3.0 mmol) was used. The product was obtained as a red powder (Yield: 770 mg, 76.1%). <sup>1</sup>H NMR (400 MHz, Chloroform-*d*) δ 7.60 (ddd, 2H), 7.20 – 6.89 (m, 14H), 6.75 (ddd, 2H), 6.70 – 6.63 (m, 2H), 6.57 (t, 2H), 6.23 (m, 3H), 6.13 (m, 2H), 6.03 (m, 1H), 5.58 (s, 2H), 2.26 (d, 6H), 2.19 (dd, 6H). <sup>13</sup>C NMR (101 MHz, Chloroform-*d*) δ 163.36, 163.28, 163.09, 163.01, 146.40, 146.38, 146.33, 146.31, 142.90, 142.87, 142.15, 142.11, 141.35, 140.29, 140.28, 139.71, 133.01, 132.96, 132.92, 132.53, 132.51, 132.47, 131.83, 131.16, 130.96, 130.73, 130.00, 129.81, 129.68, 129.50, 129.44, 129.42, 128.96, 128.86, 128.67, 128.47, 128.44, 128.14, 127.94, 127.91, 127.86, 127.41, 127.36, 127.08, 126.99, 126.96, 126.88, 126.20, 125.22, 125.14, 125.10, 125.08, 125.05, 122.54, 122.50, 122.42, 122.37, 58.49, 51.93, 51.87, 21.25, 18.45, 17.87, 17.83.

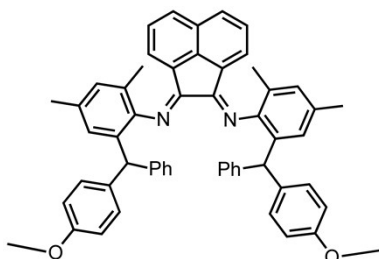

The procedure was similar to the synthesis of *rac-L1* except that 2-((4-methoxyphenyl)(phenyl)methyl)-4,6-dimethylbenzenamine (952 mg, 3.0 mmol) was used. The product was obtained as an orange powder (Yield: 756 mg, 61.7%). <sup>1</sup>H NMR (400 MHz, Chloroform-*d*) δ 7.93 – 7.53 (m, 2H), 7.34 – 6.87 (m, 14H), 6.81 (m, 4H), 6.74 (m, 2H), 6.56 – 6.39 (m, 3H), 6.23 (m, 2H), 5.93 (s, 1H), 5.82 – 5.59 (m, 2H), 3.77 (d, 6H), 3.00 (d, 6H), 2.55 – 2.16 (m, 12H). <sup>13</sup>C NMR (101 MHz, Chloroform-*d*) δ 166.12, 165.83, 158.01, 156.56, 143.50, 142.31, 142.28, 142.14, 142.12, 142.09, 140.04, 139.90, 137.12, 136.75, 136.53, 134.38, 134.35, 133.86, 133.83, 133.28, 133.22, 131.46, 131.42, 131.29, 131.25, 130.84, 130.74, 130.55, 130.23, 130.17, 129.81, 129.74, 129.59, 129.40, 129.18, 129.10, 129.07, 129.03, 128.99, 128.89, 128.85, 128.75, 128.71, 128.15, 128.04, 127.98, 127.91, 127.45, 127.20, 127.05, 126.94, 126.23, 125.91, 125.79, 125.63, 125.07, 124.98, 124.93, 124.89, 124.78, 122.54, 122.39, 113.60, 113.41, 112.80, 112.61, 55.23, 54.42, 54.35, 51.68, 51.01, 50.88, 21.41, 21.39, 21.29, 21.27, 18.34, 18.27, 17.89.

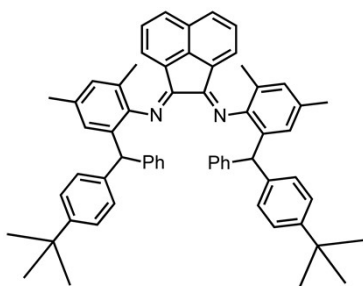

The procedure was similar to the synthesis of *rac*-**L1** except that 2-((4-tert-butylphenyl)(phenyl)methyl)-4,6-dimethylbenzenamine (1031 mg, 3.0 mmol) was used. The product was obtained as an orange powder (Yield: 513 mg, 39.3%). <sup>1</sup>H NMR (400 MHz, Chloroform-*d*) δ 7.53 – 7.42 (m, 2H), 7.17 (m, 14H), 6.83 – 6.71 (m, 4H), 6.65 (d, 2H), 6.32 (dd, 3H), 6.29 – 6.20 (m, 3H), 6.15 (d, 1H), 6.03 (d, 1H), 5.64 (d, 2H), 2.25 (d, 6H), 2.13 (d, 6H), 1.22 (s, 9H), 0.54 (s, 9H). <sup>13</sup>C NMR (101 MHz, Chloroform-*d*) δ 162.82, 162.74, 162.63, 148.58, 147.62, 147.60, 146.55, 144.09, 142.00, 140.54, 139.72, 138.73, 133.53, 133.50, 133.18, 132.69, 132.65, 129.82, 129.73, 129.65, 129.44, 129.20, 129.04, 129.00, 128.98, 128.19, 128.14, 128.12, 128.02, 127.93, 127.19, 127.15, 126.94, 126.91, 125.84, 124.93, 124.88, 124.86, 124.81, 124.78, 124.03, 122.53, 122.48, 122.43, 52.07, 52.02, 34.34, 33.47, 31.40, 30.74, 21.29, 21.28, 18.03, 17.97, 17.89.

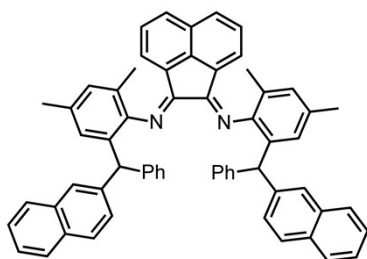

The procedure was similar to the synthesis of *rac*-**L1** except that 2,4-dimethyl-6-(naphthalen-2-yl)(phenyl)methylbenzenamine (1012 mg, 3.0 mmol) was used. The product was obtained as an orange powder (Yield: 555 mg, 43.2%). <sup>1</sup>H NMR (400 MHz, Chloroform-*d*) δ 7.99 (dd, 1H), 7.89 (dd, 1H), 7.80 – 7.61 (m, 4H), 7.57 – 7.42 (m, 2H), 7.36 – 7.22 (m, 4H), 7.17 – 6.88 (m, 14H), 6.88 – 6.77 (m, 4H), 6.74 – 6.62 (m, 2H), 6.44 – 6.37 (m, 2H), 6.21 – 6.14 (m, 2H), 5.64 (d, 2H), 2.23 (d, 6H), 1.94 (d, 6H). <sup>13</sup>C NMR (101 MHz, Chloroform-*d*) δ 163.30, 163.25, 163.19, 146.62, 143.51, 142.84, 142.04, 141.53, 141.49, 140.08, 139.32, 139.26, 133.40, 133.23, 132.97, 132.87, 132.82, 132.77, 132.73, 132.55, 132.46, 132.31, 132.09, 132.01, 131.87, 131.03, 130.93, 130.63, 130.42, 129.98, 129.90, 129.78, 129.73, 129.66, 129.43, 129.36, 129.34, 129.22, 129.13, 128.75, 128.62, 128.58, 128.54, 128.52, 128.48, 128.30, 128.24, 128.20, 128.14, 128.10, 128.05, 127.94, 127.91, 127.83, 127.74, 127.70, 127.60, 127.50, 127.45, 127.42, 127.36, 127.25, 127.20, 127.01, 126.73, 126.66, 126.64, 126.59, 126.57, 126.45, 126.05, 125.99, 125.79, 125.71, 125.45, 125.37, 125.25, 125.14, 125.10, 125.05, 125.01, 124.90, 124.74, 124.55, 124.44, 122.49, 122.35, 122.12, 121.75, 121.65, 121.46, 56.06, 52.71, 52.63, 52.51, 51.90, 51.29, 21.35, 21.32, 21.25, 18.24, 17.93, 17.55.

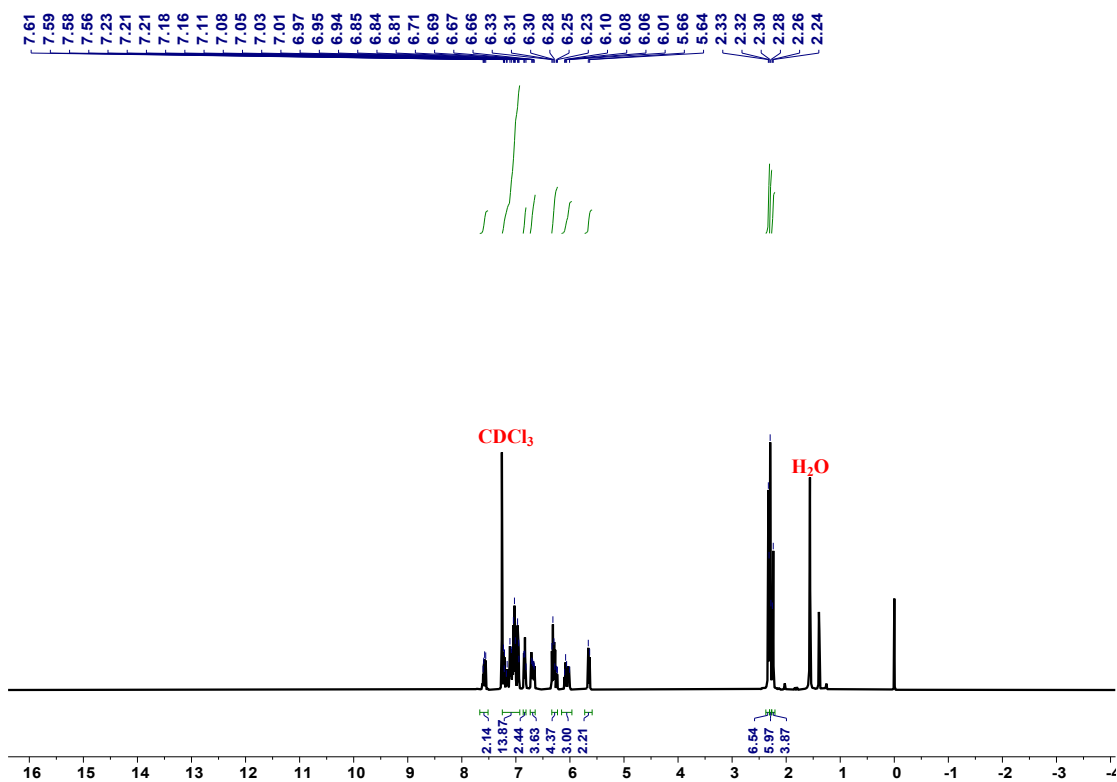

Figure S6. <sup>1</sup>H NMR of complex *rac*-L1.

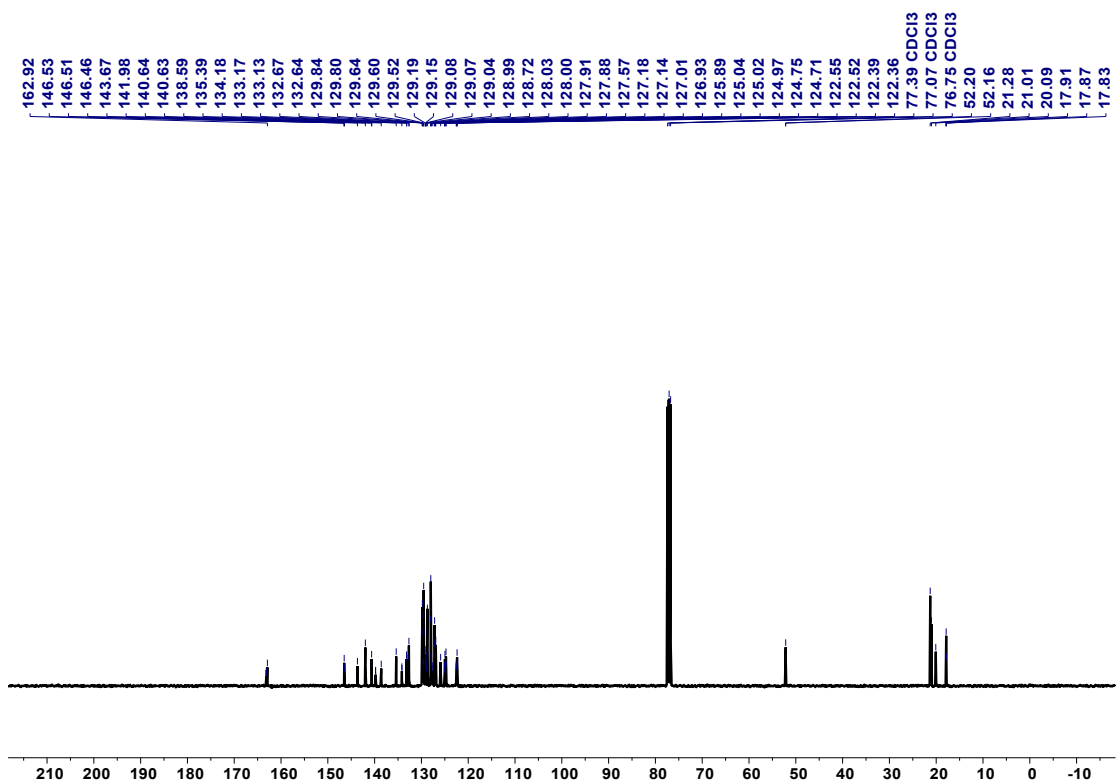

Figure S7. <sup>13</sup>C NMR of complex *rac*-L1.

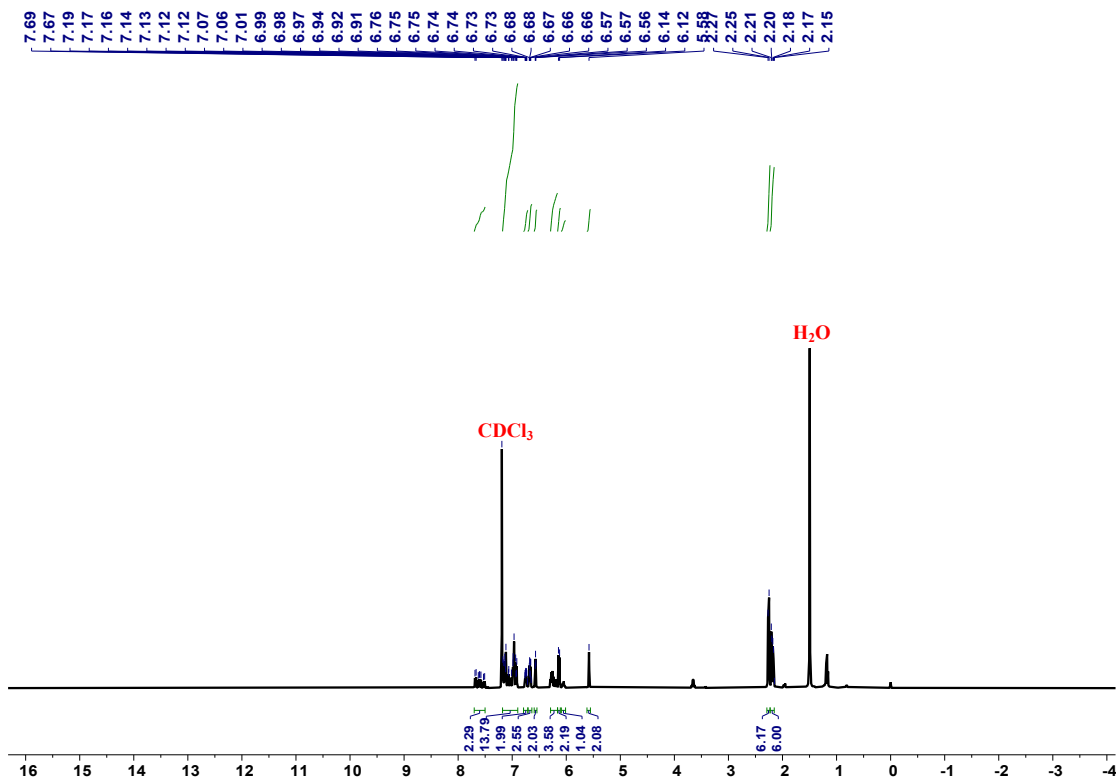

Figure S8. <sup>1</sup>H NMR of complex *rac*-L2.

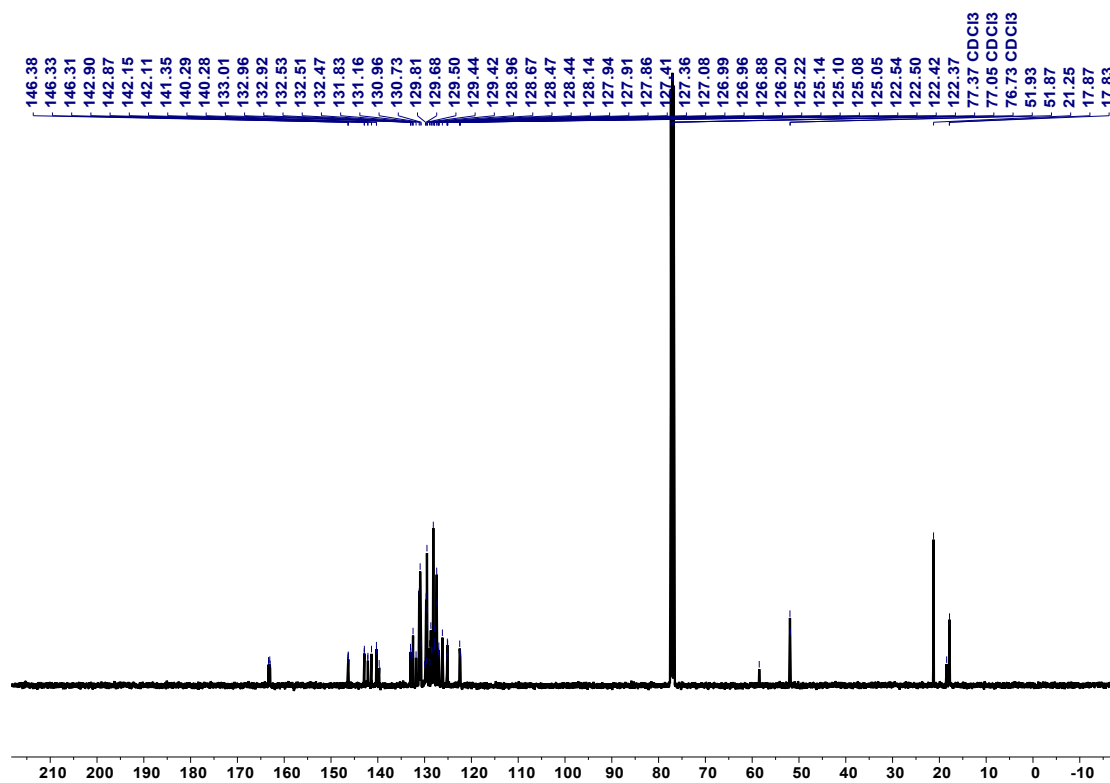

Figure S9. <sup>13</sup>C NMR of complex *rac*-L2.

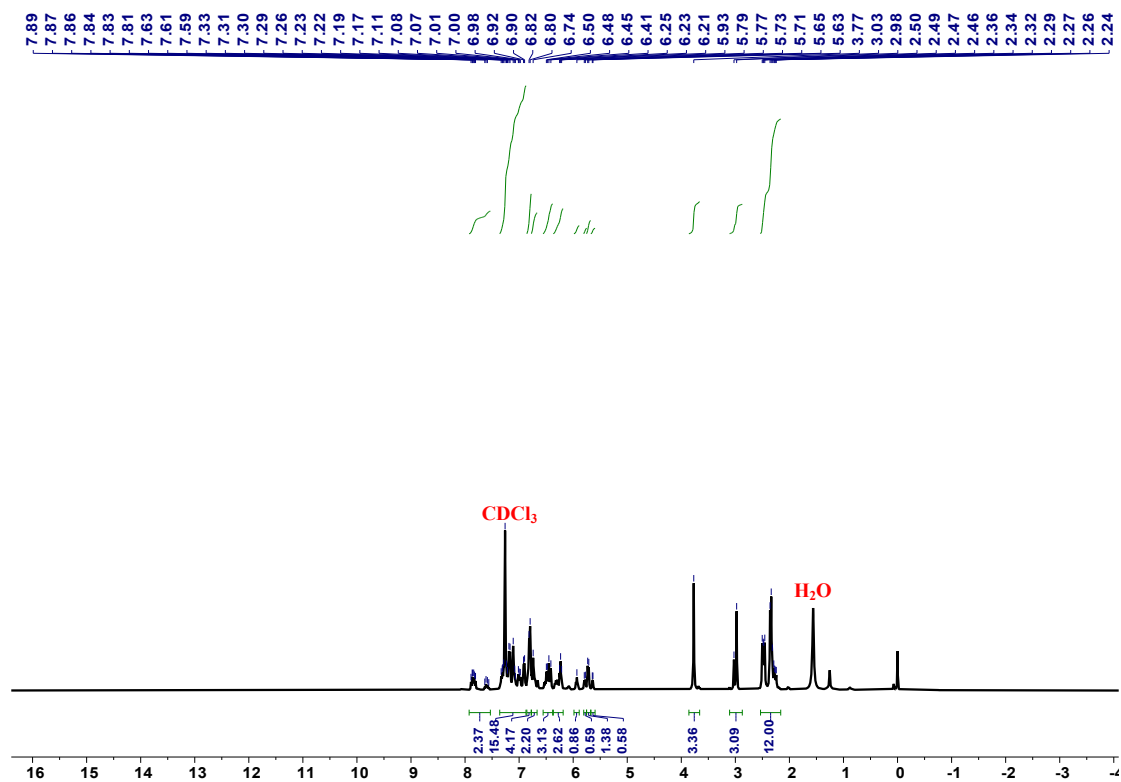

Figure S10.  $^1H$  NMR of complex *rac*-L3.

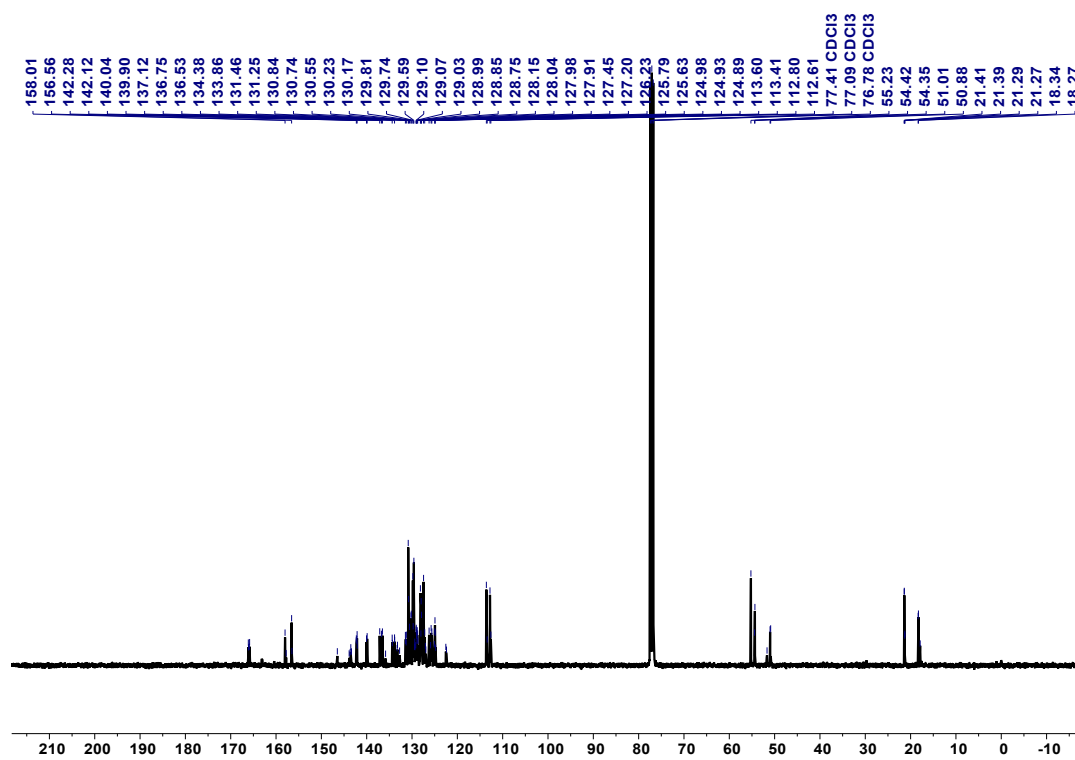

Figure S11.  $^{13}C$  NMR of complex *rac*-L3.

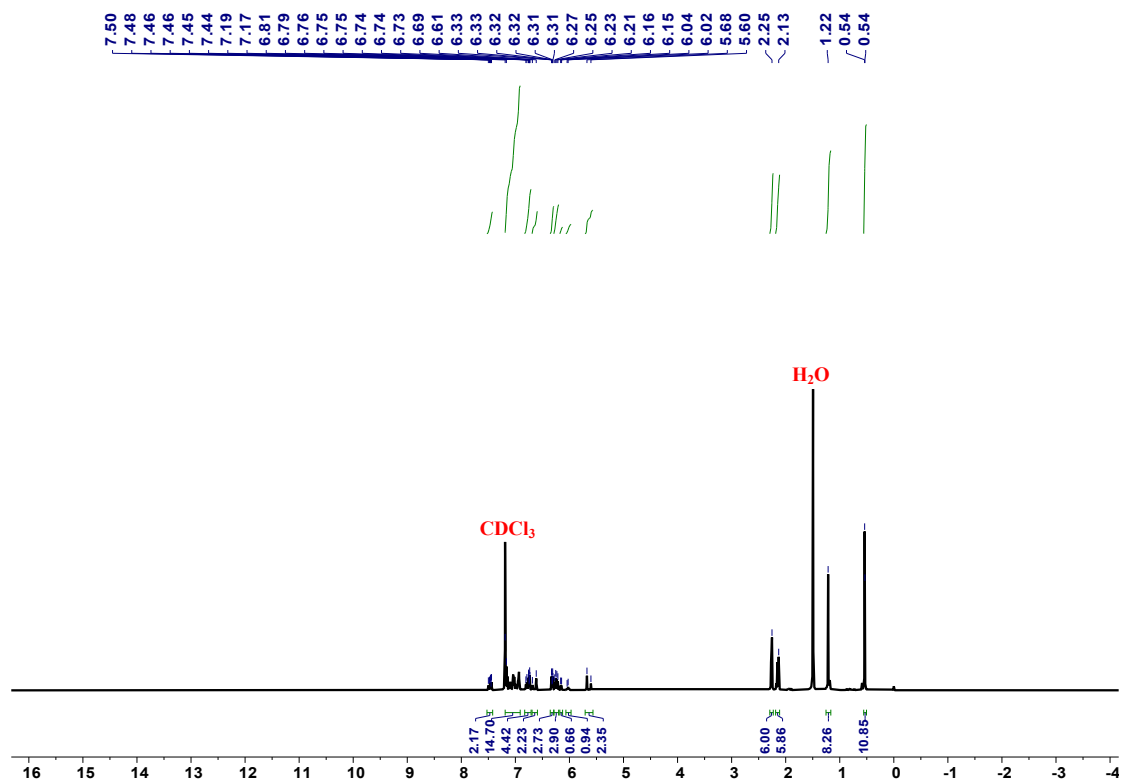

Figure S12.  $^1\text{H}$  NMR of complex *rac*-L4.

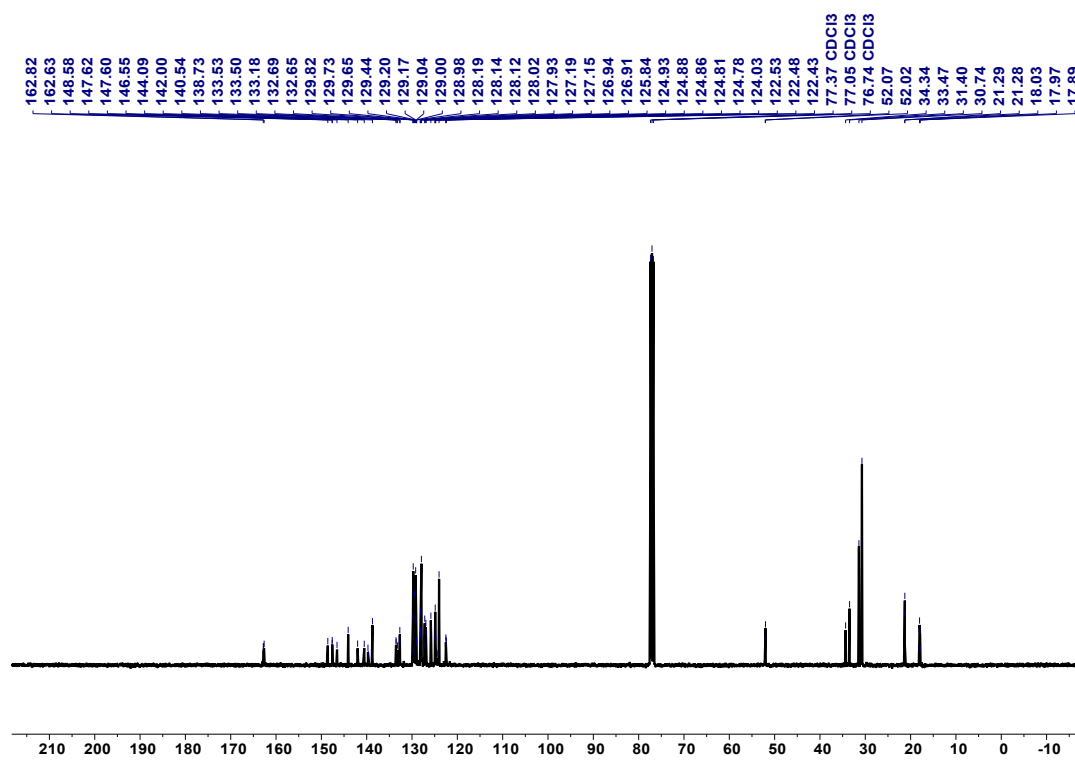

Figure S13.  $^{13}\text{C}$  NMR of complex *rac*-L4.

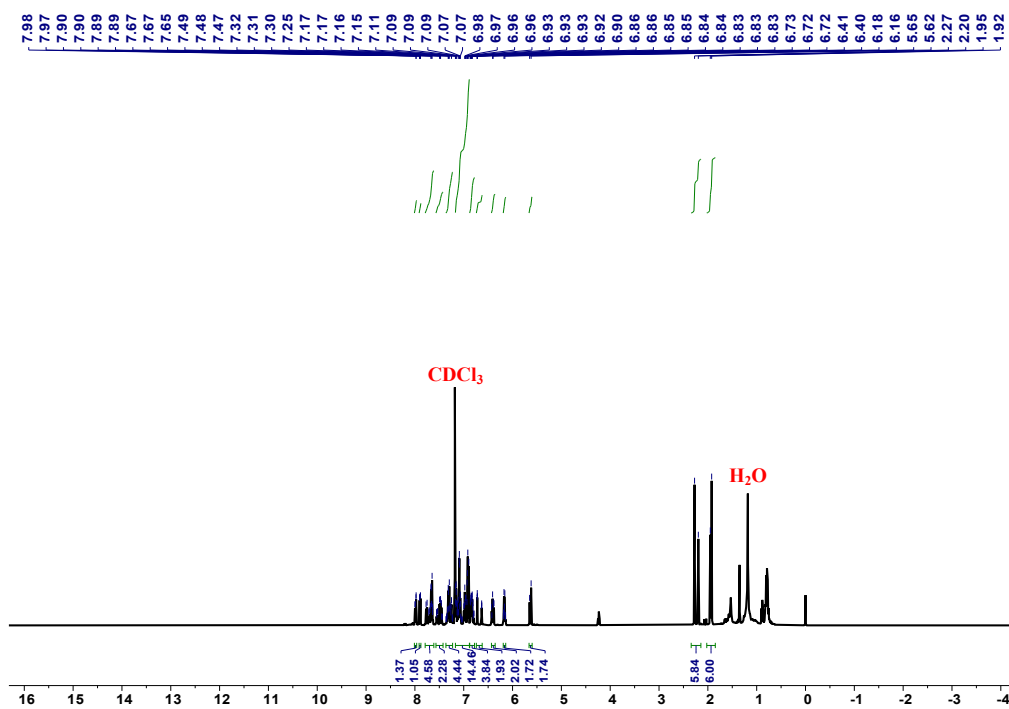

Figure S14. <sup>1</sup>H NMR of complex *rac*-L5.

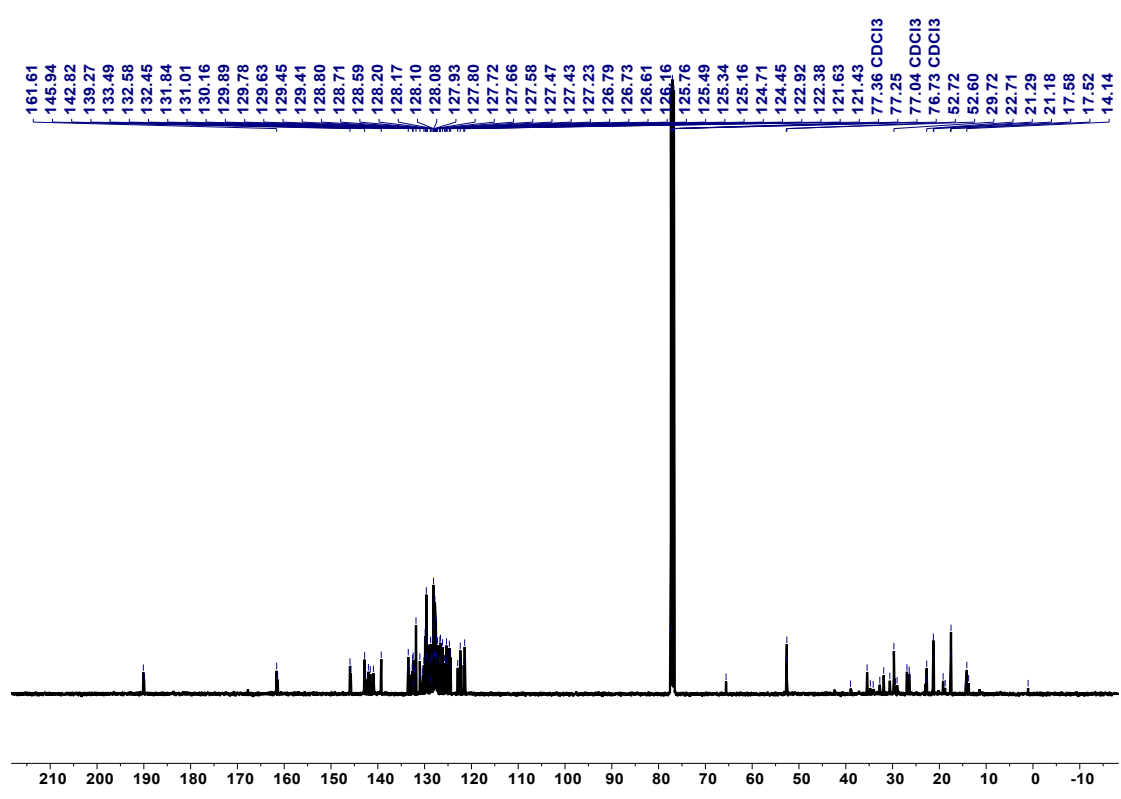

Figure S15. <sup>13</sup>C NMR of complex *rac*-L5.
